# Supplementary material for: Effect of long-term drought on tomato leaves: the impact on metabolic and antioxidative response
Source: Springer Nature journal article supplement (doi:10.1007/s12298-021-01102-2), 2021-11-22
Supplement: MOESM1 [file 12298_2021_1102_MOESM1_ESM.pdf]

**Supplementary file 1.** Forward and reverse primers of analyzed genes

| Primers                     | Forward                       | Reverse                      |
|-----------------------------|-------------------------------|------------------------------|
| <i>ZEP1-2</i>               | TGCATGGCCATAGAGGATAG          | TGGATGACTCCAACTCGAAG         |
| <i>SLAPX<sub>cyto</sub></i> | CCTTTGTGATCCTGCTTTCC          | CAGCTCTTCCAATCAGCATC         |
| <i>NCED1</i>                | AGGCAACAGTGAAACTTCCA          | TCCATTAAAGAGGATATTACCG       |
| <i>SLAPX<sub>cp</sub></i>   | TCAAG<br>TTGATCCACCTGAGGGTTTC | GGGAC<br>TCCAAGCCTTCGTATTCTG |
